# Supplementary material for: Effect of Meloxicam on Behavior, Physiology and Pain Sensitivity in Holstein Calves Following Dehorning
Source: Research Square preprint supplement (doi:10.21203/rs.3.rs-116984/v1), 2020-12-09
Supplement: Supplementary file 1 [file 1411668c77aad8d63b3870f0.docx]

**Effect of meloxicam on behavior, physiology and pain sensitivity in Holstein calves following dehorning**

**Supplementary material**

Zhiqiang Li1#, Yulong Zhang1#, Yaocheng Cui1, Jianchen Qi1, Dongjie Cai1, Jing Fang1, Tianyu Tan1, Huawei Zou2, Yue Xie1, Hongrui Guo1, Shiyi Chen3, Jun Yi4, Wei Wang4, Xiaoping Ma1, Liping Gou1, Hengmin Cui1, Yi Geng1, Ming Zhang3, Gang Ye1, Zhijun Zhong1, Zhihua Ren1, Yanchun Hu1, Ya Wang1, Junliang Deng1, Shuming Yu1, Suizhong Cao1, Zhicai Zuo1*, Zhisheng Wang2*

1Key Laboratory of Animal Disease and Human Health of Sichuan Province, College of Veterinary Medicine, Sichuan Agricultural University, Chengdu, Sichuan, China

2Animal Nutrition Institute, Sichuan Agricultural University, Chengdu, Sichuan, China

3College of animal Science and Technology, Sichuan Agricultural University, Chengdu, Sichuan, China

4Sichuan Academy of Agricultural Sciences, Chengdu, Sichuan, China

***Corresponding authors**

Email: zzcjl@126.com (ZZ)

Email: wangzs67@163.com (ZW)

#These two authors contributed equally to this work.

**Supplementary Figure S1.** The means ± SEM of the THI during the whole experiment.

**
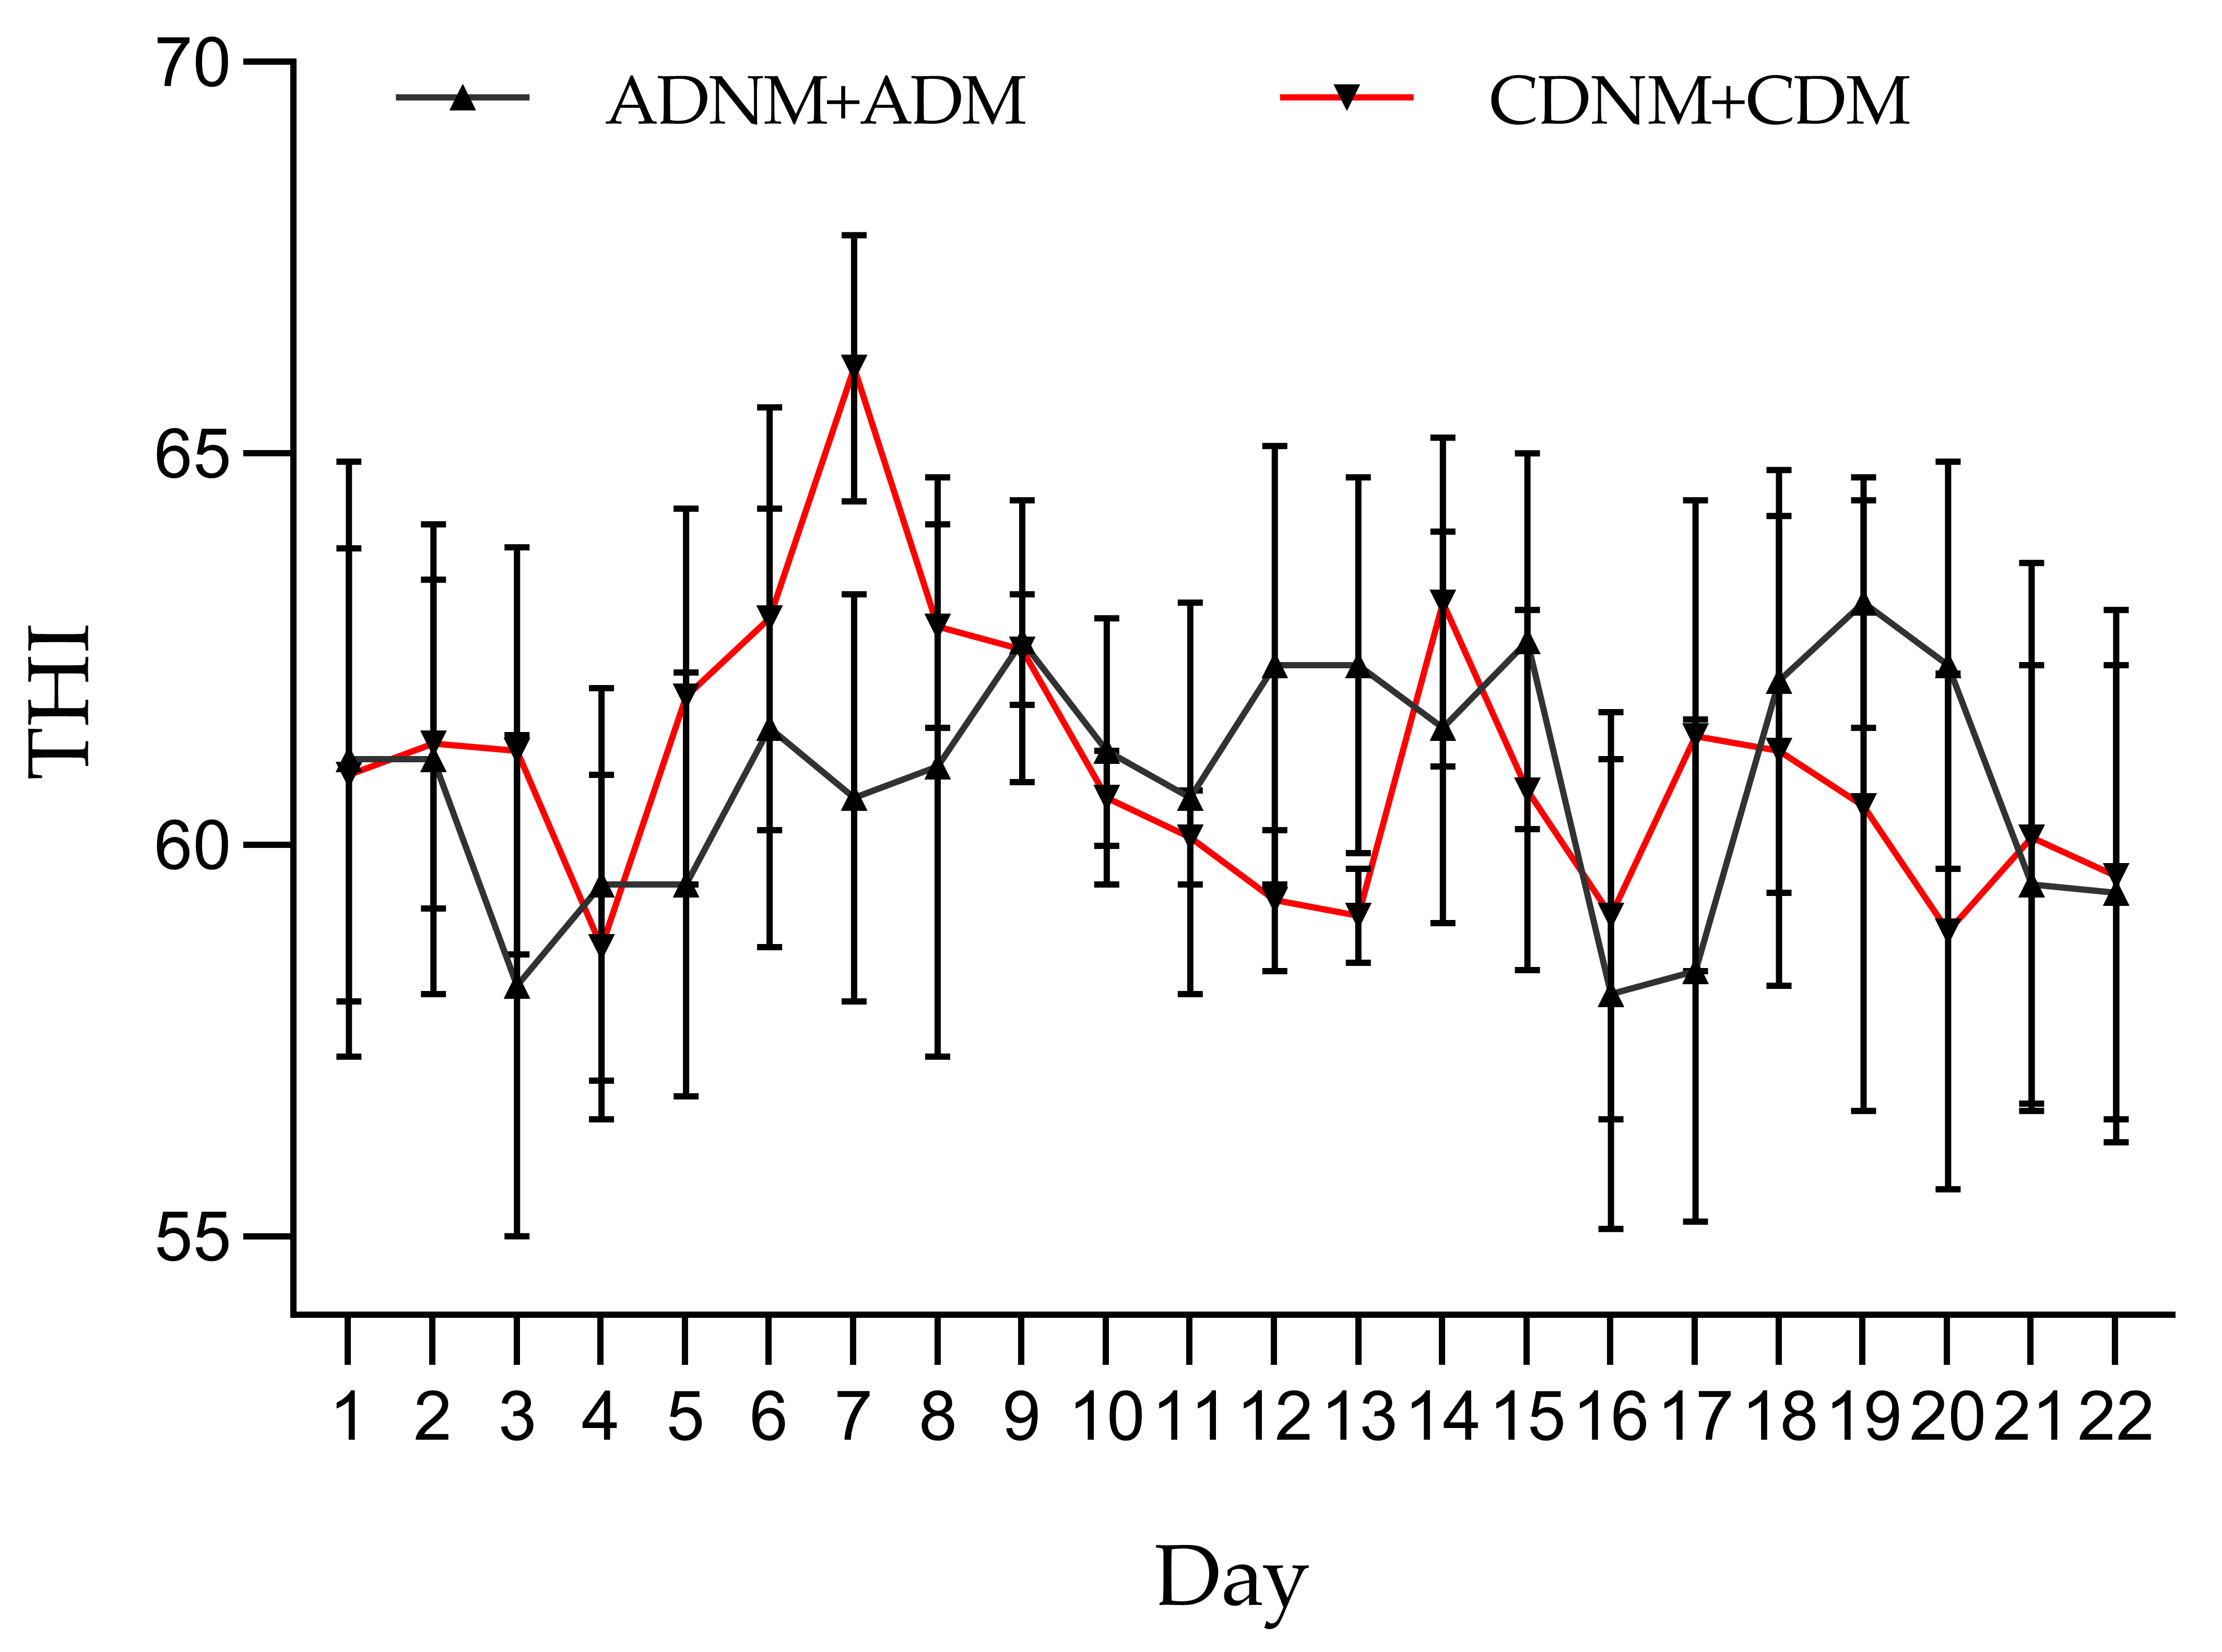
**
